# Supplementary material for: Development of a Novel Storm Surge Inundation Model Framework for Efficient Prediction
Source: Copernicus journal article supplement (doi:10.5194/gmd-2024-12), 2024-02-05

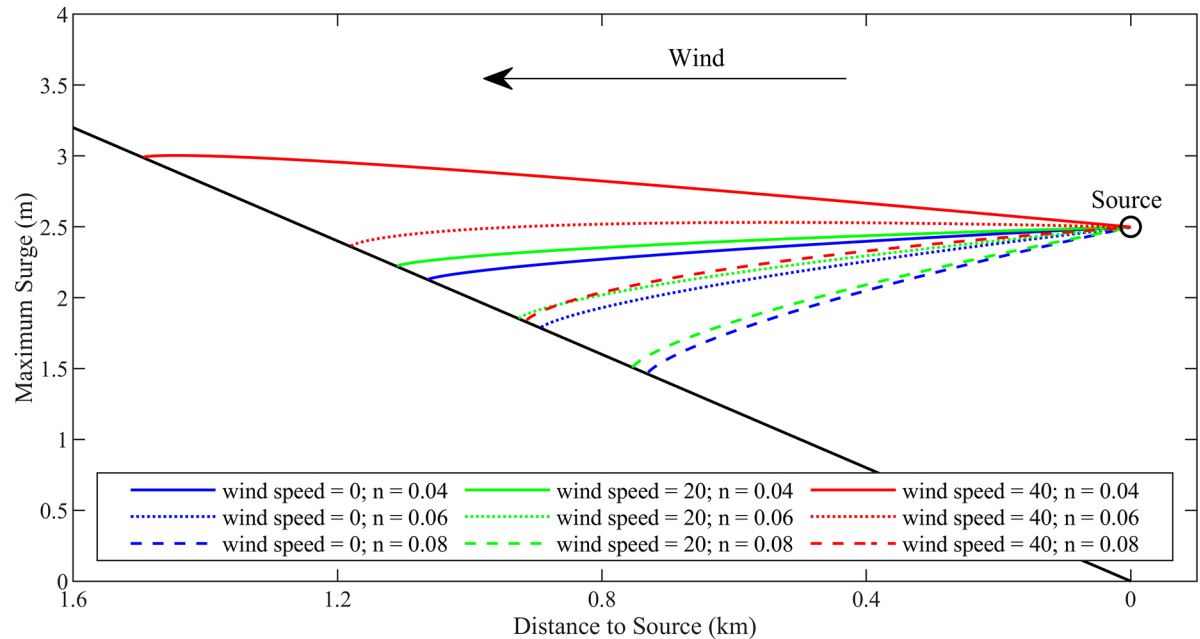

Supplement: Supplementary file [file gmd-2024-12-AC2-supplement.pdf]
